# Supplementary material
Source: PubMed Central journal article supplement (PMC4367265)
Supplement: supp_M114.633586_jbc.M114.633586-1.pdf [file supp_M114.633586_jbc.M114.633586-1.pdf]

Supplemental Information

**Non-native, N-terminal Hsp70 Molecular Motor-recognition Elements in Transit Peptides Support Plastid Protein Translocation**

Prakitchai Chotewutmontri<sup>1</sup> and Barry D. Bruce<sup>2§</sup>

<sup>1</sup>The Graduate School of Genome Science and Technology, <sup>2</sup>the Department of Biochemistry and Cellular and Molecular Biology, University of Tennessee, Knoxville, TN 37996

<sup>§</sup>To whom correspondence should be addressed: Barry D. Bruce, Department of Biochemistry and Cellular and Molecular Biology, University of Tennessee, Knoxville, TN 37996, Tel.: (865) 974-4082; Fax: (865) 974-0978; E-mail: bbruce@utk.edu

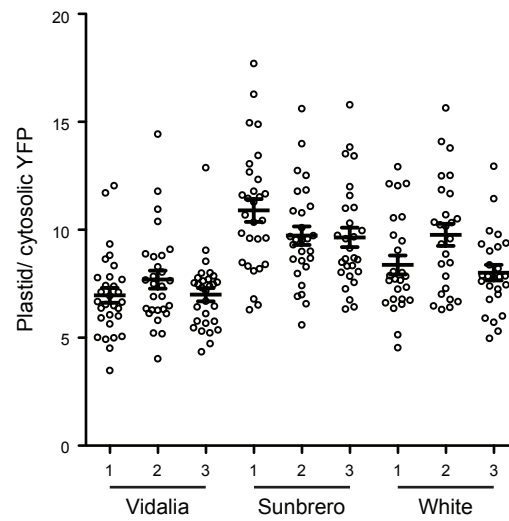

**Supplemental Figure S1.** Effect of onion cultivar on the targeting of fluorescent proteins into the plastids. The plastid targeting ratios of tobacco SS<sub>tp</sub>-20-YFP were determined using 3 cultivars of onion: Vidalia, Sunbrero and White Onion. The ratios were determined from 3 independent assays (labeled 1,2 and 3) for each cultivar. Tukey's test showed that the average ratios between experiments within the same cultivar are not different ( $p > 0.05$ ). However, when the data from the same cultivar were combined, the average ratios between cultivars were significantly different ( $p < 0.001$ ). Means  $\pm$  SE are shown.  $26 \leq n \leq 30$ .

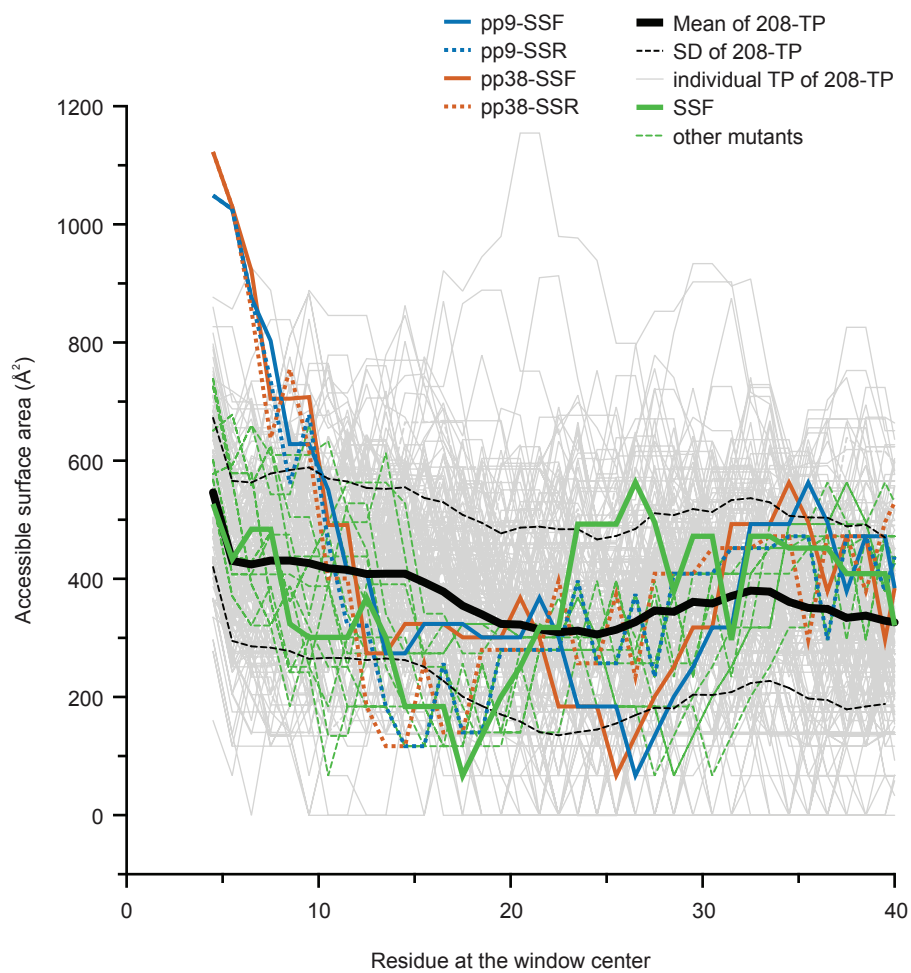

**Supplemental Figure S2.** HASA of the N-ter mutants. The combined HASA within an 8-aa window are plotted along the length of the aa sequences. The averaged HASA calculated from the 208-TP data set is shown as a reference (black line) with 95% CI (black dashed lines).

**Supplemental Table S1.** Sequence of oligonucleotides used in cloning and mutagenesis.

| Generated construct    | Oligonucleotide name | Sequence <sup>a</sup>                                                 |
|------------------------|----------------------|-----------------------------------------------------------------------|
| pBS-pp38-MtoA-SSF-YFP  | pp38-MtoA-SSF-F      | GGTGGT <u>GCTAGC</u> ATGTTCTGGGGTCTCTGGCCTTGGGGCGGCTTCTAGC            |
| pBS-pp9-MtoA-SSF-YFP   | pp9-MtoA-SSF-F       | GGTGGT <u>GCTAGC</u> ATGTGGATCTTCCCTTGGATTCAACTTGC GGCTTCTAGC         |
| pBS-PepG-MtoA-SSF-YFP  | PepG-MtoA-SSF-F      | GGTGGT <u>GCTAGC</u> ATGGGTTGGTATGGTTTCCGTCATCAGAAGCTGCGGGCTTCTAGC    |
| pBS-V10-MtoA-SSF-YFP   | V10-MtoA-SSF-F       | GGTGGT <u>GCTAGC</u> ATGTTCTACCAACTTGCTAAGACCTGTCCAGTTGCGGGCTTCTAGC   |
| pBS-DRC8-MtoA-SSF-YFP  | DRC8-MtoA-SSF-F1     | GGACCAAGAGGTCATTTCTACGATGCAGCGGCTTCTAGC                               |
|                        | DRC8-MtoA-SSF-F2     | GGTGGT <u>GCTAGC</u> ATGTACCTTGTGGACCAAGAGGTCATTTCTACG                |
| pBS-A6R-MtoA-SSF-YFP   | A6R-MtoA-SSF-F       | GGTGGT <u>GCTAGC</u> ATGGCCAGCCATCTGGGTCTGGCCCGTGC GGCTTCTAGC         |
| pBS-HbS-MtoA-SSF-YFP   | HbS-MtoA-SSF-F       | GGTGGT <u>GCTAGC</u> ATGGTGCATCTGACCCCGGTGAAAAAGCGGCTTCTAGC           |
| pBS-np09-MtoA-SSF-YFP  | np09-MtoA-SSF-F      | GGTGGT <u>GCTAGC</u> ATGCGGTGTGATCCGGTTGTGCTTTCGCGGCTTCTAGC           |
| pBS-HA-MtoA-SSF-YFP    | HA-MtoA-SSF-F        | GGTGGT <u>GCTAGC</u> ATGTACCCGTACGATGTTCCGGACTACGACGGGCTTCTAGC        |
| pBS-pp38-MtoA-SSR-YFP  | pp38-MtoA-SSR-F      | GGTGGT <u>GCTAGC</u> ATGTTCTGGGGTCTCTGGCCTTGGGGCGTGAAGGTACG           |
| pBS-pp9-MtoA-SSR-YFP   | pp9-MtoA-SSR-F       | GGTGGT <u>GCTAGC</u> ATGTGGATCTTCCCTTGGATTCAACTTGC GGTTAAGGTACG       |
| pBS-PepG-MtoA-SSR-YFP  | PepG-MtoA-SSR-F      | GGTGGT <u>GCTAGC</u> ATGGGTTGGTATGGTTTCCGTCATCAGAAGCTGCGGGTGAAGGTACG  |
| pBS-V10-MtoA-SSR-YFP   | V10-MtoA-SSR-F       | GGTGGT <u>GCTAGC</u> ATGTTCTACCAACTTGCTAAGACCTGTCCAGTTGCGGTGAAGGTACG  |
| pBS-DRC8-MtoA-SSR-YFP  | DRC8-MtoA-SSR-F1     | GGACCAAGAGGTCATTTCTACGATGCAGCGTGAAGGTACGTGG                           |
|                        | DRC8-MtoA-SSR-F2     | GGTGGT <u>GCTAGC</u> ATGTACCTTGTGGACCAAGAGGTCATTTCTACG                |
| pBS-A6R-MtoA-SSR-YFP   | A6R-MtoA-SSR-F       | GGTGGT <u>GCTAGC</u> ATGGCCAGCCATCTGGGTCTGGCCCGTGC GGTTAAGGTACGTGG    |
| pBS-HbS-MtoA-SSR-YFP   | HbS-MtoA-SSR-F       | GGTGGT <u>GCTAGC</u> ATGGTGCATCTGACCCCGGTGAAAAAGCGTGAAGGTACGTGG       |
| pBS-np09-MtoA-SSR-YFP  | np09-MtoA-SSR-F      | GGTGGT <u>GCTAGC</u> ATGAGAGTTGATCCAGTTGTGGCTTTCGCGTGAAGGTACGTGG      |
| pBS-HA-MtoA-SSR-YFP    | HA-MtoA-SSR-F        | GGTGGT <u>GCTAGC</u> ATGTACCCATACGATGTTCCGACTACGACGGTGAAGGTACGTGG     |
| pBS-FlipN10SSF-YFP     | Flip-SSF-F           | GGTGGT <u>GCTAGC</u> ATGGTTGCTTCTCCAGCATCATGAGCGCAACCACTGTTCCCGTGC    |
| pBS-FlipN10FDF-YFP     | Flip-FDF-F           | GGTGGT <u>GCTAGC</u> ATGGTTTCTCTGACTTCCCTGACCTCTGCCTCTGCTTCTGCTGC     |
| pBS-ScrambleN10SSF-YFP | Scramble-SSF-F       | GGTGGT <u>GCTAGC</u> ATGGTTTCTTCAGCAATCAGCGCATCCACCAGTTCCTCCG         |
| pBS-ScrambleN10FDF-YFP | Scramble-FDF-F       | GGTGGT <u>GCTAGC</u> ATGTTCTTCGCTGACCGTGACCCCTGGCATCTTCTGCTTCTGCTGC   |
| All of pBS construct   | nos-R                | CTTAACGTAATTC AACAGAA                                                 |
| pET-NheI-YFP           | XbaI-RBS-NcoI-F      | CTAGAAATAATTTTGTTTAACTTTAAGAAGGAGAT <u>GCTAGCC</u>                    |
|                        | XbaI-RBS-NcoI-R      | CATGGGCTAGCATCTCCTTCTTAAAGTAAACAAAATTTT                               |
| pET-m20-YFP            | m20-NdeI-F           | GGTGGT <u>CATATGC</u> AGGTGTGGCCACC                                   |
|                        | T7ter                | GCTAGTTATTGCTCAGCGG                                                   |
| pET-m20-YFP6xHis       | 6xHis-F              | GTACAAGGGCAGCCATCACCATCACCATCACTAAC                                   |
|                        | 6xHis-R              | TCGAGTTAGTGATGGTGATGGTGATGGCTGCCTT                                    |
| pET-30a-prSSU          | NheI-prSSU-Nt-F      | GGTGGT <u>GCTAGC</u> ATGGCTTCTCAGTTCTTCC                              |
|                        | BsrGI-prSSU-Nt-R     | GGTGGT <u>TGTAC</u> AGGTAGCCTTCTGGCTTGTAGG                            |
| pET-30a-prSSU-3xHAH    | T7pro                | TAATACGACTCACTATAGGGG                                                 |
|                        | 1xHA-6xHis-R         | GGTGGT <u>CTCGAGG</u> TAATCTGGAACATCGTATGGTAGCCGGAGTAGCCTTCTGGCTTGTGA |
|                        | 2xHA-6xHis-R         | GGTGGT <u>CTCGAG</u> ATAGTCCGGGACGTCATACGGATAGCCAGCGTAATCTGGAACATCGTA |
|                        | 3xHA-6xHis-R         | GGTGGT <u>CTCGAGG</u> TAGTCTGGAACATCGTACGGTAGGAACCTGCATAGTCCGGGACGTC  |
| pET-His-mCSS1          | NdeI-His-mCSS1-F     | GGTGGT <u>CATATGC</u> ACCATCATCATCATCTTCTTGGTGTGAGTGAAGTTCGTTG        |
|                        | NotI-mCSS1-R         | GGTGGT <u>GCGGCCG</u> CTCATTAGAGTCTGTAATAATC                          |
| pET-His-mCSS1-mut      | L167-F               | CGGCAACGTTAAACTGGATTGCTCTGCTATCG                                      |
|                        | L270-F               | CTTTTGATGTCTCAGTGTGGAGGTTGGTGACGGAG                                   |
|                        | L373-F               | GAAGAGCTGTGTTGATGCTGCTGACAGACTTAGGACAC                                |
|                        | L652-F               | CCTTGGCTGCCCTGAACCAGGAAGTTATGACG                                      |

<sup>a</sup> The restriction sites are underlined.

**Supplemental Table S2.** H70BS clustering and TargetP prediction of the 208-TP dataset.

| Hsp70 cluster group | SWISS-PROT ID | Lee et al. (2008) Group | TargetP prediction |                   |           |
|---------------------|---------------|-------------------------|--------------------|-------------------|-----------|
|                     |               |                         | Localization       | Reliability class | TP length |
| 1                   | Q9SUI7        | None                    | Chloroplast        | 3                 | 44        |
| 1                   | Q8W0Y8        | None                    | Chloroplast        | 2                 | 49        |
| 1                   | Q949Y5        | None                    | Chloroplast        | 3                 | 18        |
| 1                   | Q9XI84        | DnaJ-J8                 | Chloroplast        | 1                 | 57        |
| 1                   | P27521        | PORA                    | Chloroplast        | 2                 | 49        |
| 1                   | P52032        | None                    | Chloroplast        | 1                 | 72        |
| 1                   | Q9LYU9        | DnaJ-J8                 | Chloroplast        | 3                 | 80        |
| 1                   | Q9SAG8        | DnaJ-J8                 | Chloroplast        | 1                 | 46        |
| 1                   | Q41932        | None                    | Chloroplast        | 3                 | 48        |
| 1                   | Q39195        | DnaJ-J8                 | Chloroplast        | 1                 | 69        |
| 1                   | P93009        | RbcS                    | Chloroplast        | 3                 | 70        |
| 1                   | P25856        | PORA                    | Chloroplast        | 2                 | 45        |
| 1                   | P10797        | RbcS                    | Chloroplast        | 3                 | 54        |
| 1                   | Q96242        | BCCP                    | Chloroplast        | 2                 | 32        |
| 1                   | P25697        | DnaJ-J8                 | Chloroplast        | 3                 | 54        |
| 1                   | O22170        | None                    | Other              | 2                 | -         |
| 1                   | Q9C5W3        | None                    | Chloroplast        | 2                 | 61        |
| 1                   | O49347        | Cab                     | Chloroplast        | 2                 | 50        |
| 1                   | O22886        | None                    | Chloroplast        | 2                 | 35        |
| 2                   | O24621        | BCCP                    | Chloroplast        | 1                 | 32        |
| 2                   | Q9STE8        | DnaJ-J8                 | Chloroplast        | 1                 | 79        |
| 2                   | Q9SCY0        | DnaJ-J8                 | Chloroplast        | 5                 | 52        |
| 2                   | Q9FKP0        | None                    | Secretory Pathway  | 5                 | 16        |
| 2                   | O22056        | GLU2                    | Chloroplast        | 3                 | 39        |
| 2                   | Q93WC9        | None                    | Other              | 4                 | -         |
| 2                   | P82538        | None                    | Chloroplast        | 1                 | 74        |
| 2                   | Q949X0        | TOCC                    | Chloroplast        | 2                 | 53        |
| 2                   | Q9SI53        | TOCC                    | Mitochondrion      | 5                 | 76        |
| 2                   | Q0WVNZ5       | None                    | Chloroplast        | 5                 | 33        |
| 2                   | Q8L493        | RbcS                    | Chloroplast        | 2                 | 57        |
| 2                   | Q9ZR03        | None                    | Chloroplast        | 3                 | 50        |
| 2                   | Q9C642        | None                    | Chloroplast        | 2                 | 48        |
| 2                   | P25702        | None                    | Chloroplast        | 4                 | 51        |
| 2                   | P25701        | DnaJ-J8                 | Chloroplast        | 2                 | 51        |
| 2                   | Q8LPN3        | BCCP                    | Chloroplast        | 1                 | 45        |
| 2                   | Q9S7N7        | None                    | Chloroplast        | 1                 | 59        |
| 2                   | Q9SR43        | DnaJ-J8                 | Chloroplast        | 2                 | 45        |
| 2                   | Q9SY10        | TOCC                    | Chloroplast        | 4                 | 61        |
| 2                   | Q9FYC2        | RbcS                    | Chloroplast        | 1                 | 49        |
| 3                   | Q96291        | BCCP                    | Chloroplast        | 1                 | 83        |
| 3                   | O24600        | None                    | Chloroplast        | 1                 | 95        |
| 3                   | P04777        | None                    | Chloroplast        | 3                 | 23        |
| 3                   | Q8LCA1        | GLU2                    | Chloroplast        | 1                 | 45        |
| 3                   | Q9LS03        | None                    | Chloroplast        | 1                 | 78        |
| 3                   | Q93ZB2        | None                    | Secretory Pathway  | 1                 | 16        |
| 3                   | Q8S9K3        | Cab                     | Chloroplast        | 4                 | 33        |
| 3                   | P10796        | RbcS                    | Chloroplast        | 3                 | 54        |
| 3                   | P10798        | RbcS                    | Chloroplast        | 4                 | 54        |
| 3                   | P10795        | RbcS                    | Chloroplast        | 3                 | 54        |
| 3                   | Q9SRL5        | RbcS                    | Chloroplast        | 2                 | 44        |
| 3                   | Q9FYL3        | PORA                    | Chloroplast        | 3                 | 45        |
| 3                   | P50318        | RbcS                    | Chloroplast        | 1                 | 95        |
| 3                   | Q9SMW0        | None                    | Chloroplast        | 3                 | 49        |
| 3                   | Q93ZC5        | DnaJ-J8                 | Chloroplast        | 1                 | 52        |
| 3                   | Q93W77        | RbcS                    | Chloroplast        | 1                 | 69        |
| 3                   | Q39101        | RbcS                    | Chloroplast        | 2                 | 47        |
| 3                   | O24629        | None                    | Other              | 5                 | -         |
| 3                   | Q9SUI5        | DnaJ-J8                 | Chloroplast        | 4                 | 32        |
| 3                   | Q9SKP6        | DnaJ-J8                 | Chloroplast        | 2                 | 58        |
| 3                   | Q9SUI4        | RbcS                    | Chloroplast        | 2                 | 50        |
| 3                   | Q39194        | RbcS                    | Chloroplast        | 3                 | 44        |
| 3                   | Q9LQK7        | BCCP                    | Chloroplast        | 2                 | 36        |
| 3                   | Q02166        | None                    | Chloroplast        | 2                 | 63        |
| 3                   | O78310        | None                    | Chloroplast        | 1                 | 61        |
| 3                   | P04778        | None                    | Chloroplast        | 3                 | 23        |
| 3                   | Q9FUZ2        | RbcS                    | Chloroplast        | 5                 | 56        |
| 3                   | Q3EAJ6        | Cab                     | Chloroplast        | 4                 | 35        |
| 4                   | Q9LDH1        | None                    | Chloroplast        | 3                 | 54        |
| 4                   | Q9LTF4        | None                    | Other              | 5                 | -         |
| 4                   | Q9ZS97        | None                    | Chloroplast        | 1                 | 63        |
| 4                   | Q9M7I7        | None                    | Chloroplast        | 4                 | 47        |
| 4                   | P57720        | RbcS                    | Chloroplast        | 2                 | 39        |
| 4                   | P46248        | RbcS                    | Chloroplast        | 4                 | 41        |
| 4                   | Q9SQK3        | PORA                    | Chloroplast        | 1                 | 39        |
| 4                   | P82658        | None                    | Chloroplast        | 4                 | 32        |
| 4                   | Q8LBP4        | None                    | Chloroplast        | 2                 | 55        |
| 4                   | P25851        | RbcS                    | Chloroplast        | 1                 | 57        |
| 4                   | Q9FGS4        | DnaJ-J8                 | Chloroplast        | 1                 | 69        |

Supplemental Table S2. (continue)

| Hsp70 cluster group | SWISS-PROT ID | Lee et al. (2008) Group | TargetP prediction |                   |           |  |
|---------------------|---------------|-------------------------|--------------------|-------------------|-----------|--|
|                     |               |                         | Localization       | Reliability class | TP length |  |
| 4                   | Q9LER7        | Cab                     | Chloroplast        | 1                 | 64        |  |
| 4                   | P46644        | None                    | Chloroplast        | 4                 | 64        |  |
| 4                   | P21238        | None                    | Chloroplast        | 2                 | 45        |  |
| 4                   | Q05753        | RbcS                    | Chloroplast        | 4                 | 36        |  |
| 4                   | Q9LS01        | GLU2                    | Chloroplast        | 1                 | 56        |  |
| 4                   | Q9SA14        | DnaJ-J8                 | Mitochondrion      | 5                 | 35        |  |
| 4                   | Q944G9        | None                    | Chloroplast        | 2                 | 46        |  |
| 4                   | Q9C5U8        | RbcS                    | Chloroplast        | 4                 | 29        |  |
| 4                   | O48782        | None                    | Chloroplast        | 1                 | 54        |  |
| 4                   | Q39199        | DnaJ-J8                 | Chloroplast        | 2                 | 51        |  |
| 4                   | Q39002        | None                    | Chloroplast        | 5                 | 21        |  |
| 4                   | O80575        | None                    | Chloroplast        | 2                 | 68        |  |
| 4                   | Q9M5K4        | None                    | Chloroplast        | 1                 | 23        |  |
| 4                   | O82499        | BCCP                    | Mitochondrion      | 2                 | 46        |  |
| 4                   | Q94FY7        | TOCC                    | Chloroplast        | 1                 | 98        |  |
| 4                   | Q9XFH8        | BCCP                    | Chloroplast        | 2                 | 57        |  |
| 4                   | Q8W033        | BCCP                    | Other              | 5                 | -         |  |
| 4                   | Q9LYN2        | RbcS                    | Chloroplast        | 1                 | 48        |  |
| 4                   | Q9S720        | None                    | Chloroplast        | 2                 | 26        |  |
| 5                   | Q9XF89        | None                    | Chloroplast        | 2                 | 48        |  |
| 5                   | Q9S714        | None                    | Chloroplast        | 1                 | 46        |  |
| 5                   | Q3E9T1        | None                    | Chloroplast        | 2                 | 33        |  |
| 5                   | Q94AY1        | None                    | Chloroplast        | 5                 | 74        |  |
| 5                   | Q9SRN1        | None                    | Other              | 4                 | -         |  |
| 5                   | Q3EA16        | RbcS                    | Other              | 4                 | -         |  |
| 5                   | P81760        | GLU2                    | Chloroplast        | 4                 | 33        |  |
| 5                   | Q9S831        | None                    | Chloroplast        | 2                 | 44        |  |
| 5                   | Q42029        | None                    | Chloroplast        | 2                 | 31        |  |
| 5                   | Q9ZNZ7        | GLU2                    | Chloroplast        | 2                 | 62        |  |
| 5                   | Q42536        | PORA                    | Chloroplast        | 1                 | 53        |  |
| 5                   | Q9ZU32        | Cab                     | Mitochondrion      | 3                 | 26        |  |
| 5                   | Q42588        | Cab                     | Other              | 2                 | -         |  |
| 5                   | Q948R9        | None                    | Chloroplast        | 2                 | 47        |  |
| 5                   | Q00218        | RbcS                    | Chloroplast        | 4                 | 47        |  |
| 5                   | Q8LEB5        | None                    | Other              | 1                 | -         |  |
| 5                   | O82730        | None                    | Other              | 3                 | -         |  |
| 5                   | Q9S841        | None                    | Chloroplast        | 3                 | 28        |  |
| 5                   | Q01908        | None                    | Chloroplast        | 1                 | 42        |  |
| 5                   | P21218        | PORA                    | Chloroplast        | 1                 | 43        |  |
| 5                   | P10896        | DnaJ-J8                 | Chloroplast        | 1                 | 58        |  |
| 5                   | Q5XET4        | PORA                    | Chloroplast        | 2                 | 60        |  |
| 5                   | Q84JH7        | None                    | Chloroplast        | 2                 | 46        |  |
| 5                   | Q9XIK3        | None                    | Chloroplast        | 1                 | 55        |  |
| 5                   | Q9XF91        | DnaJ-J8                 | Chloroplast        | 5                 | 59        |  |
| 5                   | Q39161        | None                    | Chloroplast        | 3                 | 25        |  |
| 5                   | O04921        | None                    | Chloroplast        | 1                 | 49        |  |
| 5                   | Q9TOP4        | GLU2                    | Chloroplast        | 2                 | 72        |  |
| 5                   | P69834        | DnaJ-J8                 | Mitochondrion      | 5                 | 92        |  |
| 5                   | O64903        | None                    | Chloroplast        | 1                 | 62        |  |
| 5                   | O22160        | None                    | Chloroplast        | 1                 | 34        |  |
| 6                   | O04130        | None                    | Chloroplast        | 3                 | 49        |  |
| 6                   | O48741        | PORA                    | Chloroplast        | 3                 | 66        |  |
| 6                   | Q9LD95        | None                    | Chloroplast        | 1                 | 55        |  |
| 6                   | Q9SW33        | None                    | Chloroplast        | 4                 | 21        |  |
| 6                   | O22773        | None                    | Chloroplast        | 1                 | 38        |  |
| 6                   | Q9M401        | PORA                    | Chloroplast        | 2                 | 60        |  |
| 6                   | Q9CAK8        | RbcS                    | Chloroplast        | 1                 | 52        |  |
| 6                   | P92935        | None                    | Mitochondrion      | 5                 | 80        |  |
| 6                   | Q84W65        | None                    | Chloroplast        | 2                 | 66        |  |
| 6                   | P46310        | DnaJ-J8                 | Chloroplast        | 2                 | 81        |  |
| 6                   | Q9LW57        | GLU2                    | Chloroplast        | 1                 | 72        |  |
| 6                   | Q9MBA1        | None                    | Chloroplast        | 2                 | 36        |  |
| 6                   | Q9XF88        | None                    | Chloroplast        | 2                 | 39        |  |
| 6                   | Q9SAK2        | BCCP                    | Chloroplast        | 3                 | 29        |  |
| 6                   | Q9SX22        | None                    | Chloroplast        | 2                 | 56        |  |
| 6                   | O49292        | None                    | Chloroplast        | 5                 | 52        |  |
| 6                   | O49196        | None                    | Chloroplast        | 4                 | 59        |  |
| 6                   | Q9M439        | PORA                    | Mitochondrion      | 4                 | 22        |  |
| 6                   | Q9S756        | None                    | Chloroplast        | 1                 | 52        |  |
| 6                   | Q9LR75        | RbcS                    | Chloroplast        | 2                 | 48        |  |
| 6                   | Q43316        | RbcS                    | Chloroplast        | 1                 | 86        |  |
| 6                   | Q9S193        | TOCC                    | Mitochondrion      | 5                 | 10        |  |
| 6                   | Q9SZ52        | None                    | Chloroplast        | 5                 | 62        |  |
| 7                   | P37271        | None                    | Chloroplast        | 1                 | 70        |  |
| 7                   | Q9SEU8        | None                    | Chloroplast        | 1                 | 72        |  |
| 7                   | Q07473        | None                    | Chloroplast        | 3                 | 40        |  |
| 7                   | Q94IC9        | TOCC                    | Mitochondrion      | 4                 | 58        |  |
| 7                   | Q38802        | BCCP                    | Chloroplast        | 1                 | 60        |  |
| 7                   | Q9S7W1        | None                    | Chloroplast        | 3                 | 26        |  |
| 7                   | P42699        | BCCP                    | Chloroplast        | 1                 | 52        |  |
| 7                   | Q9SKT0        | RbcS                    | Chloroplast        | 1                 | 67        |  |
| 7                   | Q43307        | BCCP                    | Chloroplast        | 2                 | 62        |  |
| 7                   | Q42533        | BCCP                    | Chloroplast        | 1                 | 82        |  |
| 7                   | Q38933        | None                    | Other              | 2                 | -         |  |
| 7                   | P49077        | PORA                    | Chloroplast        | 2                 | 68        |  |
| 7                   | Q66GR6        | None                    | Chloroplast        | 3                 | 75        |  |

Supplemental Table S2. (continue)

| Hsp70 cluster group | SWISS-PROT ID | Lee et al. (2008) Group | TargetP prediction |                   |           |
|---------------------|---------------|-------------------------|--------------------|-------------------|-----------|
|                     |               |                         | Localization       | Reliability class | TP length |
| 7                   | Q8RWW6        | None                    | Chloroplast        | 1                 | 70        |
| 7                   | P49107        | RbcS                    | Chloroplast        | 5                 | 81        |
| 7                   | Q8LD49        | None                    | Chloroplast        | 1                 | 67        |
| 7                   | P27202        | RbcS                    | Chloroplast        | 3                 | 40        |
| 7                   | Q93VA3        | None                    | Chloroplast        | 4                 | 18        |
| 7                   | P11490        | DnaJ-J8                 | Chloroplast        | 1                 | 66        |
| 7                   | Q9SEU7        | None                    | Chloroplast        | 1                 | 67        |
| 7                   | Q9M591        | Cab                     | Chloroplast        | 1                 | 36        |
| 7                   | P42732        | RbcS                    | Chloroplast        | 2                 | 46        |
| 7                   | Q9FMT1        | GLU2                    | Other              | 5                 | -         |
| 7                   | Q43349        | None                    | Chloroplast        | 1                 | 65        |
| 7                   | P16127        | RbcS                    | Chloroplast        | 1                 | 60        |
| 8                   | Q84RQ7        | None                    | Chloroplast        | 2                 | 99        |
| 8                   | Q93WX6        | DnaJ-J8                 | Chloroplast        | 2                 | 35        |
| 8                   | Q9LUD9        | None                    | Chloroplast        | 3                 | 39        |
| 8                   | Q9LS02        | None                    | Chloroplast        | 1                 | 77        |
| 8                   | Q8GXU8        | None                    | Chloroplast        | 4                 | 56        |
| 8                   | Q9SJE1        | None                    | Chloroplast        | 2                 | 49        |
| 8                   | Q9S7H1        | None                    | Chloroplast        | 2                 | 44        |
| 8                   | Q9LFV0        | BCCP                    | Chloroplast        | 1                 | 45        |
| 8                   | Q9SA56        | None                    | Chloroplast        | 1                 | 43        |
| 8                   | Q38854        | None                    | Chloroplast        | 1                 | 58        |
| 8                   | Q9S7D1        | None                    | Chloroplast        | 2                 | 58        |
| 8                   | Q9CA35        | DnaJ-J8                 | Chloroplast        | 1                 | 71        |
| 8                   | Q8W105        | Cab                     | Chloroplast        | 2                 | 90        |
| 8                   | Q38885        | RbcS                    | Chloroplast        | 1                 | 67        |
| 8                   | O23403        | None                    | Chloroplast        | 1                 | 75        |
| 8                   | Q9SUI6        | None                    | Chloroplast        | 4                 | 44        |
| 8                   | O81439        | DnaJ-J8                 | Chloroplast        | 2                 | 55        |
| 9                   | Q39089        | None                    | Chloroplast        | 2                 | 22        |
| 9                   | O50039        | RbcS                    | Chloroplast        | 1                 | 53        |
| 9                   | Q9XFT3        | None                    | Chloroplast        | 2                 | 44        |
| 9                   | O22265        | RbcS                    | Chloroplast        | 1                 | 56        |
| 9                   | P42762        | None                    | Chloroplast        | 1                 | 89        |
| 9                   | Q9SCX9        | None                    | Chloroplast        | 3                 | 32        |
| 9                   | O82796        | GLU2                    | Chloroplast        | 4                 | 15        |
| 9                   | P32068        | RbcS                    | Chloroplast        | 5                 | 60        |
| 9                   | Q96255        | PORA                    | Chloroplast        | 1                 | 63        |
| 9                   | Q9CAP8        | None                    | Chloroplast        | 5                 | 30        |
| 9                   | P21240        | None                    | Chloroplast        | 1                 | 53        |
| 9                   | Q93W20        | None                    | Chloroplast        | 1                 | 16        |
| 9                   | Q9SIU4        | None                    | Chloroplast        | 3                 | 10        |
| 9                   | P16972        | None                    | Chloroplast        | 1                 | 52        |
| 9                   | O04090        | PORA                    | Chloroplast        | 2                 | 69        |
